# Supplementary material for: Ocrelizumab Extended Interval Dosing in Primary Progressive Multiple Sclerosis: An Italian Experience
Source: PubMed Central journal article supplement (PMC10788893; doi:10.2174/1570159x22666231002142709), 2023-10-02
Supplement: CN-22-339_SD1.pdf [file CN-22-339_SD1.pdf]

## Supplementary Material

# Ocrelizumab Extended Interval Dosing in Primary Progressive Multiple Sclerosis: An Italian Experience

Aurora Zanghi<sup>1</sup>, Diana Ferraro<sup>2</sup>, Graziella Callari<sup>3</sup>, Paola Valentino<sup>4</sup>, Franco Granella<sup>5</sup>, Francesco Patti<sup>6</sup>, Giacomo Lus<sup>7</sup>, Simona Bonavita<sup>8</sup>, Maria Claudia Moretti<sup>1</sup>, Carlo Avolio<sup>1</sup> and Emanuele D'Amico<sup>1,\*</sup>

<sup>1</sup>Department of Medical and Surgical Sciences, University of Foggia, Foggia, Italy; <sup>2</sup>University of Modena and Reggio Emilia, Modena, Emilia-Ronagna, Italy; <sup>3</sup>IRCSS G.Giglio, Cefalù, Italy; <sup>4</sup>Azienda Ospedaliera Universitaria "Mater Domini", Catanzaro, Italy; <sup>5</sup>Unit of Neurosciences, Department of Medicine and Surgery, University of Parma, Parma, Italy and Multiple Sclerosis Centre, Department of General Medicine, Parma University Hospital, Parma, Italy; <sup>6</sup>Department "G.F. Ingrassia"; MS center University of Catania, Catania, Italy; <sup>7</sup>Multiple Sclerosis Center, II Division of Neurology, Department of Clinical and Experimental Medicine, Second University of Naples, Naples, Italy; <sup>8</sup>Dipartimento di Scienze Mediche e Chirurgiche Avanzate, Università della Campania Luigi Vanvitelli, Piazza Miraglia, 2, 80138 Naples, Italy

## STROBE Checklist

## STROBE Statement—checklist of items that should be included in reports of observational studies

|                              | Item No. | Recommendation                                                                                                                                                                                | Page No. | Relevant text from manuscript |
|------------------------------|----------|-----------------------------------------------------------------------------------------------------------------------------------------------------------------------------------------------|----------|-------------------------------|
| Title and abstract           | 1        | (a) Indicate the study's design with a commonly used term in the title or the abstract                                                                                                        |          |                               |
|                              |          | (b) Provide in the abstract an informative and balanced summary of what was done and what was found                                                                                           |          |                               |
| <b>Introduction</b>          |          |                                                                                                                                                                                               |          |                               |
| Background/rationale         | 2        | Explain the scientific background and rationale for the investigation being reported                                                                                                          |          |                               |
| Objectives                   | 3        | State specific objectives, including any prespecified hypotheses                                                                                                                              |          |                               |
| <b>Methods</b>               |          |                                                                                                                                                                                               |          |                               |
| Study design                 | 4        | Present key elements of study design early in the paper                                                                                                                                       |          |                               |
| Setting                      | 5        | Describe the setting, locations, and relevant dates, including periods of recruitment, exposure, follow-up, and data collection                                                               |          |                               |
| Participants                 | 6        | a) <b>Cohort study</b> —Give the eligibility criteria, and the sources and methods of selection of participants. Describe methods of follow-up                                                |          |                               |
|                              |          | b) <b>Case-control study</b> —Give the eligibility criteria, and the sources and methods of case ascertainment and control selection. Give the rationale for the choice of cases and controls |          |                               |
|                              |          | c) <b>Cross-sectional study</b> —Give the eligibility criteria, and the sources and methods of selection of participants                                                                      |          |                               |
|                              |          | d) <b>Cohort study</b> —For matched studies, give matching criteria and number of exposed and unexposed                                                                                       |          |                               |
|                              |          | e) <b>Case-control study</b> —For matched studies, give matching criteria and the number of controls per case                                                                                 |          |                               |
| Variables                    | 7        | Clearly define all outcomes, exposures, predictors, potential confounders, and effect modifiers. Give diagnostic criteria, if applicable                                                      |          |                               |
| Data sources/<br>measurement | 8*       | For each variable of interest, give sources of data and details of methods of assessment (measurement). Describe comparability of assessment methods if there is more than one group          |          |                               |
| Bias                         | 9        | Describe any efforts to address potential sources of bias                                                                                                                                     |          |                               |

## STROBE Checklist

|                        |     |                                                                                                                                                                                                                                                                                                           |  |  |
|------------------------|-----|-----------------------------------------------------------------------------------------------------------------------------------------------------------------------------------------------------------------------------------------------------------------------------------------------------------|--|--|
| Study size             | 10  | Explain how the study size was arrived at                                                                                                                                                                                                                                                                 |  |  |
| Quantitative variables | 11  | Explain how quantitative variables were handled in the analyses. If applicable, describe which groupings were chosen and why                                                                                                                                                                              |  |  |
| Statistical methods    | 12  | (a) Describe all statistical methods, including those used to control for confounding                                                                                                                                                                                                                     |  |  |
|                        |     | (b) Describe any methods used to examine subgroups and interactions                                                                                                                                                                                                                                       |  |  |
|                        |     | (c) Explain how missing data were addressed                                                                                                                                                                                                                                                               |  |  |
|                        |     | (d) <i>Cohort study</i> —If applicable, explain how loss to follow-up was addressed<br><i>Case-control study</i> —If applicable, explain how matching of cases and controls was addressed<br><i>Cross-sectional study</i> —If applicable, describe analytical methods taking account of sampling strategy |  |  |
|                        |     | (e) Describe any sensitivity analyses                                                                                                                                                                                                                                                                     |  |  |
| <b>Results</b>         |     |                                                                                                                                                                                                                                                                                                           |  |  |
| Participants           | 13* | (a) Report numbers of individuals at each stage of study—eg numbers potentially eligible, examined for eligibility, confirmed eligible, included in the study, completing follow-up, and analysed                                                                                                         |  |  |
|                        |     | (b) Give reasons for non-participation at each stage                                                                                                                                                                                                                                                      |  |  |
|                        |     | (c) Consider use of a flow diagram                                                                                                                                                                                                                                                                        |  |  |
| Descriptive data       | 14* | (a) Give characteristics of study participants (eg demographic, clinical, social) and information on exposures and potential confounders                                                                                                                                                                  |  |  |
|                        |     | (b) Indicate number of participants with missing data for each variable of interest                                                                                                                                                                                                                       |  |  |
|                        |     | (c) <i>Cohort study</i> —Summarise follow-up time (eg, average and total amount)                                                                                                                                                                                                                          |  |  |
| Outcome data           | 15* | <i>Cohort study</i> —Report numbers of outcome events or summary measures over time                                                                                                                                                                                                                       |  |  |
|                        |     | <i>Case-control study</i> —Report numbers in each exposure category, or summary measures of exposure                                                                                                                                                                                                      |  |  |
|                        |     | <i>Cross-sectional study</i> —Report numbers of outcome events or summary measures                                                                                                                                                                                                                        |  |  |
| Main results           | 16  | (a) Give unadjusted estimates and, if applicable, confounder-adjusted estimates and their precision (eg, 95% confidence interval). Make clear which confounders were adjusted for and why they were included                                                                                              |  |  |
|                        |     | (b) Report category boundaries when continuous variables were categorized                                                                                                                                                                                                                                 |  |  |

**STROBE Checklist**

|                          |    |                                                                                                                                                                            |  |  |
|--------------------------|----|----------------------------------------------------------------------------------------------------------------------------------------------------------------------------|--|--|
|                          |    | (c) If relevant, consider translating estimates of relative risk into absolute risk for a meaningful time period                                                           |  |  |
| Other analyses           | 17 | Report other analyses done—eg analyses of subgroups and interactions, and sensitivity analyses                                                                             |  |  |
| <b>Discussion</b>        |    |                                                                                                                                                                            |  |  |
| Key results              | 18 | Summarise key results with reference to study objectives                                                                                                                   |  |  |
| Limitations              | 19 | Discuss limitations of the study, taking into account sources of potential bias or imprecision. Discuss both direction and magnitude of any potential bias                 |  |  |
| Interpretation           | 20 | Give a cautious overall interpretation of results considering objectives, limitations, multiplicity of analyses, results from similar studies, and other relevant evidence |  |  |
| Generalisability         | 21 | Discuss the generalisability (external validity) of the study results                                                                                                      |  |  |
| <b>Other information</b> |    |                                                                                                                                                                            |  |  |
| Funding                  | 22 | Give the source of funding and the role of the funders for the present study and, if applicable, for the original study on which the present article is based              |  |  |

**\*Give information separately for cases and controls in case-control studies and, if applicable, for exposed and unexposed groups in cohort and cross-sectional studies.**
